# Supplementary material for: Complex interaction between dengue virus replication and expression of miRNA-133a
Source: Springer Nature journal article supplement (doi:10.1186/s12879-016-1364-y), 2015-12-01
Supplement: MOESM1 [file 9740724]

Serotype (code)  
UTR starts at (nt)

| DV1 (NC_001477.1)      |                       |                    | DV2 (NC_001474.2)      |                       |                     | DV3 (NC_001475.2)      |                       |                    | DV4 (NC_002640.1)      |                       |                    |
|------------------------|-----------------------|--------------------|------------------------|-----------------------|---------------------|------------------------|-----------------------|--------------------|------------------------|-----------------------|--------------------|
| Position in the genome | Position in the 3'UTR | Name               | Position in the genome | Position in the 3'UTR | Name                | Position in the genome | Position in the 3'UTR | Name               | Position in the genome | Position in the 3'UTR | Name               |
| 10274                  |                       |                    | 10273                  |                       |                     | 10268                  |                       |                    | 10266                  |                       |                    |
| 10645                  | 371                   | hsa-miR-637        | 10634                  | 361                   | hsa-miR-637         | 10422                  | 154                   | hsa-miR-557        | 10277                  | 11                    | hsa-miR-140-5p     |
| 10337                  | 63                    | hsa-miR-34c-5p     | 10523                  | 250                   | hsa-miR-214-star    | 10618                  | 350                   | hsa-miR-637        | 10484                  | 218                   | hsa-miR-518d-5p    |
| 10423                  | 149                   | hsa-miR-1266       | 10647                  | 374                   | hsa-miR-1254        | 10307                  | 39                    | hsa-miR-34c-5p     | 10471                  | 205                   | hsa-miR-665        |
| 10414                  | 140                   | hsa-miR-27a-star   | 10677                  | 404                   | hsa-miR-16          | 10631                  | 363                   | hsa-miR-1254       | 10346                  | 80                    | hsa-miR-637        |
| 10659                  | 385                   | hsa-miR-1254       | 10565                  | 292                   | hsa-miR-146a-star   | 10515                  | 247                   | hsa-miR-642        | 10444                  | 178                   | hsa-miR-27a-star   |
| 10496                  | 222                   | hsa-miR-642        | 10490                  | 217                   | hsa-miR-149-star    | 10463                  | 195                   | hsa-miR-645        | 10573                  | 307                   | hsa-miR-1254       |
| 10338                  | 64                    | hsa-miR-34b-star   | 10549                  | 276                   | hsa-miR-766         | 10661                  | 393                   | hsa-miR-16         | 10405                  | 139                   | hsa-miR-642        |
| 10490                  | 216                   | hsa-miR-645        | 10398                  | 125                   | hsa-miR-650         | 10530                  | 262                   | hsa-miR-149-star   | 10603                  | 337                   | hsa-miR-16         |
| 10689                  | 415                   | hsa-miR-16         | 10616                  | 343                   | hsa-miR-9           | 10293                  | 25                    | hsa-miR-1180       | 10606                  | 340                   | hsa-miR-16         |
| 10576                  | 302                   | hsa-miR-146a-star  | 10538                  | 265                   | hsa-miR-1184        | 10411                  | 143                   | hsa-miR-1915       | 10492                  | 226                   | hsa-miR-146a-star  |
| 10423                  | 149                   | hsa-miR-1915       | 10614                  | 341                   | hsa-miR-133a        | 10412                  | 144                   | hsa-miR-1915       | 10413                  | 147                   | hsa-miR-149-star   |
| 10471                  | 197                   | hsa-miR-202-star   | 10620                  | 347                   | hsa-miR-1290        | 10600                  | 332                   | hsa-miR-9          | 10532                  | 266                   | hsa-miR-1180       |
| 10628                  | 354                   | hsa-miR-9          | 10575                  | 302                   | hsa-miR-615-5p      | 10598                  | 330                   | hsa-miR-133a       | 10533                  | 267                   | hsa-miR-1180       |
| 10626                  | 352                   | hsa-miR-133a       | 10537                  | 264                   | hsa-miR-1301        | 10604                  | 336                   | hsa-miR-1290       | 10376                  | 110                   | hsa-miR-187        |
| 10632                  | 358                   | hsa-miR-1290       | 10449                  | 176                   | hsa-miR-1301        | 10526                  | 258                   | hsa-miR-615-5p     | 10293                  | 27                    | hsa-miR-373-star   |
| 10583                  | 309                   | hsa-miR-615-5p     | 10518                  | 245                   | hsa-miR-193a-5p     | 10449                  | 181                   | hsa-miR-221        | 10386                  | 120                   | hsa-miR-222-star   |
| 10584                  | 310                   | hsa-miR-615-5p     | 10390                  | 117                   | hsa-miR-604         | 10658                  | 390                   | hsa-miR-1179       | 10542                  | 276                   | hsa-miR-9          |
| 10585                  | 311                   | hsa-miR-615-5p     | 10674                  | 401                   | hsa-miR-1179        | 10437                  | 169                   | hsa-miR-143-star   | 10540                  | 274                   | hsa-miR-133a       |
| 10548                  | 274                   | hsa-miR-1301       | 10319                  | 46                    | hsa-miR-1909        | 10357                  | 89                    | hsa-miR-647        | 10546                  | 280                   | hsa-miR-1290       |
| 10447                  | 173                   | hsa-miR-1301       | 10623                  | 350                   | hsa-miR-1909        | 10518                  | 250                   | hsa-miR-516a-3p    | 10500                  | 234                   | hsa-miR-615-5p     |
| 10686                  | 412                   | hsa-miR-1179       | 10321                  | 48                    | hsa-miR-27a         | 10474                  | 206                   | hsa-miR-1914-star  | 10343                  | 77                    | hsa-miR-615-5p     |
| 10549                  | 275                   | hsa-miR-143-star   | 10489                  | 216                   | hsa-miR-1914-star   | 10475                  | 207                   | hsa-miR-1914-star  | 10499                  | 233                   | hsa-miR-615-5p     |
| 10342                  | 68                    | hsa-miR-27a        | 10464                  | 191                   | hsa-miR-181a-2-star | 10476                  | 208                   | hsa-miR-1914-star  | 10502                  | 236                   | hsa-miR-615-5p     |
| 10423                  | 149                   | hsa-miR-1471       | 10541                  | 268                   | hsa-miR-185-star    | 10350                  | 82                    | hsa-miR-185-star   | 10342                  | 76                    | hsa-miR-615-5p     |
| 10525                  | 251                   | hsa-miR-1471       | 10645                  | 372                   | hsa-miR-378         | 10349                  | 81                    | hsa-miR-185-star   | 10464                  | 198                   | hsa-miR-1301       |
| 10657                  | 383                   | hsa-miR-378        | 10568                  | 295                   | hsa-miR-1237        | 10629                  | 361                   | hsa-miR-378        | 10549                  | 283                   | hsa-miR-1909       |
| 10442                  | 168                   | hsa-miR-1237       | 10662                  | 389                   | hsa-miR-129-5p      | 10415                  | 147                   | hsa-miR-1237       | 10410                  | 144                   | hsa-miR-1914-star  |
| 10414                  | 140                   | hsa-miR-27b-star   | 10647                  | 374                   | hsa-miR-146b-3p     | 10514                  | 246                   | hsa-miR-1237       | 10412                  | 146                   | hsa-miR-1914-star  |
| 10673                  | 399                   | hsa-miR-129-5p     | 10545                  | 272                   | hsa-miR-1908        | 10646                  | 378                   | hsa-miR-129-5p     | 10411                  | 145                   | hsa-miR-1914-star  |
| 10674                  | 400                   | hsa-miR-129-5p     | 10629                  | 356                   | hsa-miR-769-5p      | 10518                  | 250                   | hsa-miR-516b-star  | 10273                  | 7                     | hsa-miR-661        |
| 10347                  | 73                    | hsa-miR-193b-star  | 10440                  | 167                   | hsa-miR-1308        | 10450                  | 182                   | hsa-miR-1178       | 10351                  | 85                    | hsa-miR-1237       |
| 10659                  | 385                   | hsa-miR-146b-3p    | 10547                  | 274                   | hsa-miR-199a-5p     | 10631                  | 363                   | hsa-miR-146b-3p    | 10398                  | 132                   | hsa-miR-943        |
| 10350                  | 76                    | hsa-miR-1908       | 10604                  | 331                   | hsa-miR-199a-5p     | 10391                  | 123                   | hsa-miR-658        | 10558                  | 292                   | hsa-miR-658        |
| 10641                  | 367                   | hsa-miR-769-5p     | 10679                  | 406                   | hsa-miR-421         | 10392                  | 124                   | hsa-miR-1908       | 10318                  | 52                    | hsa-miR-658        |
| 10473                  | 199                   | hsa-miR-508-5p     | 10302                  | 29                    | hsa-miR-2113        | 10613                  | 345                   | hsa-miR-769-5p     | 10319                  | 53                    | hsa-miR-1908       |
| 10616                  | 342                   | hsa-miR-199a-5p    | 10535                  | 262                   | hsa-miR-1207-3p     | 10427                  | 159                   | hsa-miR-128        | 10555                  | 289                   | hsa-miR-769-5p     |
| 10393                  | 119                   | hsa-miR-1287       | 10621                  | 348                   | hsa-miR-484         | 10320                  | 52                    | hsa-miR-663        | 10360                  | 94                    | hsa-miR-1268       |
| 10540                  | 266                   | hsa-miR-623        | 10526                  | 253                   | hsa-miR-720         | 10588                  | 320                   | hsa-miR-199a-5p    | 10557                  | 291                   | hsa-miR-298        |
| 10541                  | 267                   | hsa-miR-623        | 10468                  | 195                   | hsa-miR-1269        | 10515                  | 247                   | hsa-miR-623        | 10272                  | 6                     | hsa-miR-370        |
| 10336                  | 62                    | hsa-miR-657        | 10518                  | 245                   | hsa-miR-296-5p      | 10424                  | 156                   | hsa-miR-33b-star   | 10530                  | 264                   | hsa-miR-199a-5p    |
| 10336                  | 62                    | hsa-miR-103        | 10517                  | 244                   | hsa-miR-296-5p      | 10307                  | 39                    | hsa-miR-449b       | 10593                  | 327                   | hsa-miR-937        |
| 10343                  | 69                    | hsa-miR-600        | 10335                  | 62                    | hsa-miR-502-5p      | 10366                  | 98                    | hsa-miR-302a-star  | 10365                  | 99                    | hsa-miR-937        |
| 10337                  | 63                    | hsa-miR-449b       | 10411                  | 138                   | hsa-miR-141-star    | 10663                  | 395                   | hsa-miR-421        | 10294                  | 28                    | hsa-miR-1287       |
| 10691                  | 417                   | hsa-miR-421        | 10491                  | 218                   | hsa-miR-939         | 10366                  | 98                    | hsa-miR-371-5p     | 10328                  | 62                    | hsa-miR-623        |
| 10568                  | 294                   | hsa-miR-522-star   | 10461                  | 188                   | hsa-miR-18a-star    | 10605                  | 337                   | hsa-miR-484        | 10470                  | 204                   | hsa-miR-651        |
| 10546                  | 272                   | hsa-miR-622        | 10326                  | 53                    | hsa-miR-608         | 10511                  | 243                   | hsa-miR-720        | 10293                  | 27                    | hsa-miR-302a-star  |
| 10568                  | 294                   | hsa-miR-518e-star  | 10325                  | 52                    | hsa-miR-608         | 10545                  | 277                   | hsa-miR-617        | 10484                  | 218                   | hsa-miR-522-star   |
| 10568                  | 294                   | hsa-miR-518f-star  | 10550                  | 277                   | hsa-miR-30a-star    | 10326                  | 58                    | hsa-miR-502-5p     | 10293                  | 27                    | hsa-miR-371-5p     |
| 10539                  | 265                   | hsa-miR-1914       | 10633                  | 360                   | hsa-miR-30c-1-star  | 10353                  | 85                    | hsa-miR-635        | 10462                  | 196                   | hsa-miR-622        |
| 10518                  | 244                   | hsa-miR-191-star   | 10633                  | 360                   | hsa-miR-1224-5p     | 10354                  | 86                    | hsa-miR-635        | 10484                  | 218                   | hsa-miR-518e-star  |
| 10591                  | 317                   | hsa-miR-147b       | 10451                  | 178                   | hsa-miR-7a-2-star   | 10552                  | 284                   | hsa-miR-378-star   | 10278                  | 12                    | hsa-miR-373        |
| 10633                  | 359                   | hsa-miR-484        | 10414                  | 141                   | hsa-miR-500-star    | 10447                  | 179                   | hsa-miR-18a-star   | 10484                  | 218                   | hsa-miR-518f-star  |
| 10563                  | 289                   | hsa-miR-502-5p     | 10334                  | 61                    | hsa-miR-432         | 10441                  | 173                   | hsa-miR-147        | 10547                  | 281                   | hsa-miR-484        |
| 10356                  | 82                    | hsa-miR-502-5p     | 10300                  | 27                    | hsa-miR-132-star    | 10285                  | 17                    | hsa-miR-30b-star   | 10386                  | 120                   | hsa-miR-195-star   |
| 10335                  | 61                    | hsa-miR-16-1-star  | 10441                  | 168                   | hsa-miR-132-star    | 10366                  | 98                    | hsa-miR-498        | 10319                  | 53                    | hsa-miR-939        |
| 10337                  | 63                    | hsa-miR-34a        | 10321                  | 48                    | hsa-miR-27b         | 10317                  | 49                    | hsa-miR-886-5p     | 10386                  | 120                   | hsa-miR-16-1-star  |
| 10689                  | 415                   | hsa-miR-29b        | 10376                  | 103                   | hsa-miR-1307        | 10617                  | 349                   | hsa-miR-30c-1-star | 10403                  | 137                   | hsa-miR-378-star   |
| 10398                  | 124                   | hsa-miR-1538       | 10556                  | 283                   | hsa-miR-554         | 10478                  | 210                   | hsa-miR-30c-1-star | 10423                  | 157                   | hsa-miR-361-5p     |
| 10591                  | 317                   | hsa-miR-147        | 10332                  | 59                    | hsa-miR-422a        | 10617                  | 349                   | hsa-miR-1224-5p    | 10466                  | 200                   | hsa-miR-520f       |
| 10539                  | 265                   | hsa-miR-518c-star  | 10568                  | 295                   | hsa-miR-942         | 10526                  | 258                   | hsa-miR-7g         | 10387                  | 121                   | hsa-miR-770-5p     |
| 10347                  | 73                    | hsa-miR-886-5p     | 10531                  | 258                   | hsa-miR-942         | 10438                  | 170                   | hsa-miR-7a-2-star  | 10570                  | 304                   | hsa-miR-1262       |
| 10506                  | 232                   | hsa-miR-30c-1-star | 10532                  | 259                   | hsa-miR-412         | 10438                  | 170                   | hsa-miR-7g-star    | 10608                  | 342                   | hsa-miR-886-5p     |
| 10645                  | 371                   | hsa-miR-7a-2-star  | 10465                  | 192                   | hsa-miR-572         | 10618                  | 350                   | hsa-miR-612        | 10414                  | 148                   | hsa-miR-30c-1-star |
| 10465                  | 191                   | hsa-miR-7a-2-star  | 10616                  | 343                   | hsa-miR-330-5p      | 10508                  | 240                   | hsa-miR-636        | 10278                  | 12                    | hsa-miR-302a       |
| 10455                  | 181                   | hsa-miR-132-star   | 10692                  | 419                   | hsa-miR-492         | 10505                  | 237                   | hsa-miR-1307       | 10387                  | 121                   | hsa-miR-105        |
| 10465                  | 191                   | hsa-miR-7g-star    | 10531                  | 258                   | hsa-miR-1238        | 10323                  | 55                    | hsa-miR-422a       | 10357                  | 91                    | hsa-miR-324-5p     |
| 10475                  | 201                   | hsa-miR-138-2-star | 10568                  | 295                   | hsa-miR-150         | 10517                  | 249                   | hsa-miR-942        | 10374                  | 108                   | hsa-miR-7a-2-star  |
| 10646                  | 372                   | hsa-miR-612        | 10604                  | 331                   | hsa-miR-199b-5p     | 10553                  | 285                   | hsa-miR-942        | 10484                  | 218                   | hsa-miR-520c-5p    |
| 10385                  | 111                   | hsa-miR-1204       | 10553                  | 280                   | hsa-miR-22-star     | 10428                  | 160                   | hsa-miR-23b        | 10483                  | 217                   | hsa-miR-554        |
| 10392                  | 118                   | hsa-miR-1307       | 10351                  | 78                    | hsa-miR-29a-star    | 10399                  | 131                   | hsa-miR-1274a      | 10392                  | 126                   | hsa-miR-554        |
| 10616                  | 342                   | hsa-miR-1307       | 10278                  | 5                     | hsa-miR-29a-star    | 10604                  | 336                   | hsa-miR-609        | 10386                  | 120                   | hsa-miR-16-2-star  |
| 10483                  | 209                   | hsa-miR-554        | 10468                  | 195                   | hsa-miR-150-star    | 10292                  | 24                    | hsa-miR-572        | 10349                  | 83                    | hsa-miR-1274a      |
| 10353                  | 79                    | hsa-miR-422a       | 10628                  | 355                   | hsa-miR-7c          | 10268                  | 0                     | hsa-miR-328        | 10542                  | 276                   | hsa-miR-330-5p     |
| 10425                  | 151                   | hsa-miR-1274a      | 10281                  | 8                     | hsa-miR-29c-star    | 10268                  | 0                     | hsa-miR-328        | 10485                  | 219                   | hsa-miR-330-5p     |
| 10632                  | 358                   | hsa-miR-609        | 10646                  | 373                   | hsa-miR-1299        | 10462                  | 194                   | hsa-miR-328        | 10474                  | 208                   | hsa-miR-139-5p     |
| 10489                  | 215                   | hsa-miR-328        | 10356                  | 83                    | hsa-miR-663b        | 10600                  | 332                   | hsa-miR-330-5p     | 10458                  | 192                   | hsa-miR-1238       |
| 10569                  | 295                   | hsa-miR-330-5p     | 10478                  | 205                   | hsa-miR-1251        | 10676                  | 408                   | hsa-miR-492        | 10495                  | 229                   | hsa-miR-1238       |
| 10628                  | 354                   | hsa-miR-330-5p     | 10550                  | 277                   | hsa-miR-30e-star    | 10515                  | 247                   | hsa-miR-211        | 10404                  | 138                   | hsa-miR-150        |
| 10704                  | 430                   | hsa-miR-492        | 10403                  | 130                   | hsa-miR-194-star    | 10283                  | 15                    | hsa-miR-29b-2-star | 10484                  | 218                   | hsa-miR-526a       |
| 10541                  | 267                   | hsa-miR-211        | 10546                  | 273                   | hsa-miR-194-star    | 10455                  | 187                   | hsa-miR-29b-2-star | 10530                  | 264                   | hsa-miR-199b-5p    |
| 10398                  | 124                   | hsa-miR-29b-2-star | 10462                  | 189                   | hsa-miR-892a        | 10468                  | 200                   | hsa-miR-1238       | 10467                  | 201                   | hsa-miR-1911       |
| 10579                  | 305                   | hsa-miR-1238       | 10568                  | 295                   | hsa-miR-877-star    | 10468                  | 200                   | hsa-miR-150        | 10511                  | 245                   | hsa-miR-659        |
| 10542                  | 268                   | hsa-miR-1238       | 10478                  | 205                   | hsa-miR-302d-star   | 10472                  | 204                   | hsa-miR-23b-star   | 10452                  | 186                   | hsa-miR-659        |
| 10495                  | 221                   | hsa-miR-1238       | 10674                  | 401                   | hsa-miR-371-3p      | 10459                  | 191                   | hsa-miR-93-star    | 10289                  | 23                    | hsa-miR-631        |
| 10495                  | 221                   | hsa-miR-150        | 10690                  | 417                   | hsa-miR-649         | 10588                  | 320                   | hsa-miR-199b-5p    | 10453                  | 187                   | hsa-miR-1539       |
| 10311                  | 37                    | hsa-miR-1978       | 10565                  | 292                   | hsa-miR-326         | 10392                  | 124                   | hsa-miR-1226-star  | 10276                  | 10                    | hsa-miR-550        |
| 10478                  | 204                   | hsa-miR-93-star    | 10558                  | 285                   | hsa-miR-326         | 10274                  | 6                     | hsa-miR-550        | 10344                  | 78                    | hsa-miR-1225-5p    |
| 10616                  | 342                   | hsa-miR-199b-5p    | 10538                  | 265                   | hsa-miR-1205        | 10345                  | 77                    | hsa-m              |                        |                       |                    |
