# Supplementary material for: Complex interaction between dengue virus replication and expression of miRNA-133a
Source: Springer Nature journal article supplement (doi:10.1186/s12879-016-1364-y), 2015-12-01
Supplement: MOESM2 [file 9740724]

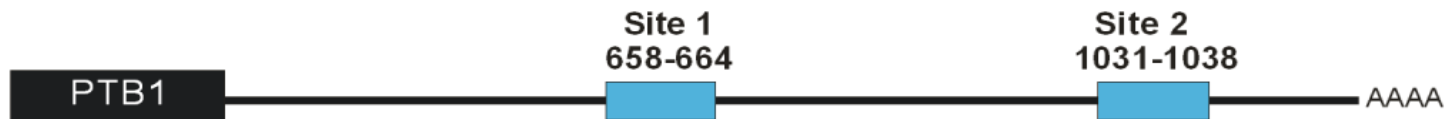

**Site 1**

3' GUCGACCAACUUCCC **CUGGUUU** 5' miR-133a

|                   |                                          |
|-------------------|------------------------------------------|
| <b>Human</b>      | GUCUGUGCCUAGCAAUAUUUCCAGUUGACCAAUAUUCUAA |
| <b>Chimpanzee</b> | GUCUGUGCCUAGCAAUAUUUCCAGUUGACCAAUAUUCUAA |
| <b>Mouse</b>      | ACCUGUGCCUAGCAAUAUUUCCACUUGACCAAUAACCGAA |
| <b>Opposum</b>    | AUCUGUGCCUAGCAAUA-UUCCAGUUGACCAAUAUUCUAA |

**Site 2**

3' GUCGACCAACUUCC **CCUGGUUU** 5' miR-133a

|                   |                                             |
|-------------------|---------------------------------------------|
| <b>Human</b>      | UUUUUCUCCUUC-AAAUUUUGGACCAAAGUCUCAUUUCUGUG  |
| <b>Chimpanzee</b> | UUUUUCUCCUUC-AAAUUUUGGACCAAAGUCUCAUUUCUGUG  |
| <b>Mouse</b>      | GGUUUCUACCUUCAAAAUUUUGGACCAAAGUUUAGCUUUC    |
| <b>Opposum</b>    | UUGUUUUUUUUUC-AAAUUGUGGACCAAAGUUUUUUUGUUUUU |
